# Supplementary material
Source: publisher figshare collection journal article supplement (https://acs.figshare.com/ndownloader/files/4703257)
Supplement: Supplementary file 1 [file 4703257]

data_publication_text
_publ_requested_journal          J.Am.Chem.Soc.
_publ_contact_author_name        'Matthias Driess'
_publ_contact_author_address     
;Institute of Chemistry: Metalorganics and Inorganic Materials,
Technische Universit\"at Berlin, 
Strasse des 17. Juni 135, Sekr. C2, D-10623 Berlin, Germany.
;
_publ_contact_author_email       matthias.driess@tu-berlin.de
_publ_contact_author_phone       0049-30-31422265
_publ_contact_author_fax         0049-30-31429732
loop_
_publ_author_name
_publ_author_address

'Yao, Shenglai'
;Institute of Chemistry: Metalorganics and Inorganic Materials,
Technische Universit\"at Berlin, 
Strasse des 17. Juni 135, Sekr. C2, D-10623 Berlin, Germany.
;
'Brym, Markus'
;Institute of Chemistry: Metalorganics and Inorganic Materials,
Technische Universit\"at Berlin, 
Strasse des 17. Juni 135, Sekr. C2, D-10623 Berlin, Germany.
;
'Driess, Matthias '
;Institute of Chemistry: Metalorganics and Inorganic Materials,
Technische Universit\"at Berlin, 
Strasse des 17. Juni 135, Sekr. C2, D-10623 Berlin, Germany.
;
 
data_yao98 
 
_audit_creation_method
;
CrysAlis RED, Oxford Diffraction Ltd.,
Version 1.171.29.10 (release 13-04-2006 CrysAlis171 .NET)
(compiled Apr 13 2006,12:24:59)
;
_chemical_name_systematic 
; 
 ? 
; 
_chemical_name_common             ? 
_chemical_melting_point           ? 
_chemical_formula_moiety          ? 
_chemical_formula_sum 
 'C123 H172 N8 O6 Si4' 
_chemical_formula_weight          1971.05 
 
loop_ 
 _atom_type_symbol 
 _atom_type_description 
 _atom_type_scat_dispersion_real 
 _atom_type_scat_dispersion_imag 
 _atom_type_scat_source 
 'C'  'C'   0.0033   0.0016 
 'International Tables Vol C Tables 4.2.6.8 and 6.1.1.4' 
 'H'  'H'   0.0000   0.0000 
 'International Tables Vol C Tables 4.2.6.8 and 6.1.1.4' 
 'N'  'N'   0.0061   0.0033 
 'International Tables Vol C Tables 4.2.6.8 and 6.1.1.4' 
 'O'  'O'   0.0106   0.0060 
 'International Tables Vol C Tables 4.2.6.8 and 6.1.1.4' 
 'Si'  'Si'   0.0817   0.0704 
 'International Tables Vol C Tables 4.2.6.8 and 6.1.1.4' 
 
_symmetry_cell_setting            triclinic 
_symmetry_space_group_name_H-M    P-1
 
loop_ 
 _symmetry_equiv_pos_as_xyz 
 'x, y, z' 
 '-x, -y, -z' 
 
_cell_length_a                    11.627(5) 
_cell_length_b                    13.155(4) 
_cell_length_c                    21.083(11) 
_cell_angle_alpha                 99.44(3) 
_cell_angle_beta                  94.68(4) 
_cell_angle_gamma                 115.22(4) 
_cell_volume                      2836(2) 
_cell_formula_units_Z             1 
_cell_measurement_temperature     150(2) 
_cell_measurement_reflns_used     2711
_cell_measurement_theta_min       3.0063
_cell_measurement_theta_max       28.7110
 
_exptl_crystal_description        rod 
_exptl_crystal_colour             colourless 
_exptl_crystal_size_max           0.27 
_exptl_crystal_size_mid           0.13 
_exptl_crystal_size_min           0.07 
_exptl_crystal_density_meas       ? 
_exptl_crystal_density_diffrn     1.154 
_exptl_crystal_density_method     'not measured' 
_exptl_crystal_F_000              1070 
_exptl_absorpt_coefficient_mu     0.110 
_exptl_absorpt_correction_type            'analytical'
_exptl_absorpt_correction_T_min   0.976
_exptl_absorpt_correction_T_max   0.992
_exptl_absorpt_process_details
;
CrysAlis RED, Oxford Diffraction Ltd.,
Version 1.171.31.5 (release 28-08-2006 CrysAlis171 .NET)
(compiled Aug 28 2006,13:05:05)
Analytical numeric absorption correction using a multifaceted crystal
			model based on expressions derived by R.C. Clark & J.S. Reid.
(Clark, R. C. & Reid, J. S. (1995). Acta Cryst. A51, 887-897)
;
 
_exptl_special_details 
; 
 ? 
; 
 
_diffrn_ambient_temperature       150(2) 
_diffrn_radiation_wavelength      0.71073 
_diffrn_radiation_type            MoK\a 
_diffrn_radiation_source 'Enhance (Mo) X-ray Source'
_diffrn_radiation_monochromator   graphite 
_diffrn_measurement_device_type   'Oxford Diffraction Xcalibur S Sapphire' 
_diffrn_measurement_method        \w 
_diffrn_detector_area_resol_mean  ? 
_diffrn_standards_number          ? 
_diffrn_standards_interval_count  ? 
_diffrn_standards_interval_time   ? 
_diffrn_standards_decay_%         ? 
_diffrn_reflns_number             22375 
_diffrn_reflns_av_R_equivalents   0.1129 
_diffrn_reflns_av_sigmaI/netI     0.3550 
_diffrn_reflns_limit_h_min        -13 
_diffrn_reflns_limit_h_max        13 
_diffrn_reflns_limit_k_min        -15 
_diffrn_reflns_limit_k_max        15 
_diffrn_reflns_limit_l_min        -25 
_diffrn_reflns_limit_l_max        25 
_diffrn_reflns_theta_min          3.02 
_diffrn_reflns_theta_max          25.00 
_reflns_number_total              9945 
_reflns_number_gt                 3743 
_reflns_threshold_expression      >2sigma(I) 
 
_computing_data_collection
;
CrysAlis CCD, Oxford Diffraction Ltd.,
Version 1.171.29.10 (release 13-04-2006 CrysAlis171 .NET)
(compiled Apr 13 2006,12:24:59)
;
_computing_cell_refinement
;
CrysAlis RED, Oxford Diffraction Ltd.,
Version 1.171.29.10 (release 13-04-2006 CrysAlis171 .NET)
(compiled Apr 13 2006,12:24:59)
;
_computing_data_reduction
;
CrysAlis RED, Oxford Diffraction Ltd.,
Version 1.171.29.10 (release 13-04-2006 CrysAlis171 .NET)
(compiled Apr 13 2006,12:24:59)
; 
_computing_structure_solution     'SHELXS-97 (Sheldrick, 1990)' 
_computing_structure_refinement   'SHELXL-97 (Sheldrick, 1997)' 
_computing_molecular_graphics     ?
_computing_publication_material   'SHELXL-97 (Sheldrick, 1997)' 
 
_refine_special_details 
; 
 Refinement of F^2^ against ALL reflections.  The weighted R-factor wR and 
 goodness of fit S are based on F^2^, conventional R-factors R are based 
 on F, with F set to zero for negative F^2^. The threshold expression of 
 F^2^ > 2sigma(F^2^) is used only for calculating R-factors(gt) etc. and is 
 not relevant to the choice of reflections for refinement.  R-factors based 
 on F^2^ are statistically about twice as large as those based on F, and R- 
 factors based on ALL data will be even larger. 
; 
 
_refine_ls_structure_factor_coef  Fsqd  
_refine_ls_matrix_type            full 
_refine_ls_weighting_scheme       calc  
_refine_ls_weighting_details 
 'calc w=1/[\s^2^(Fo^2^)+(0.0176P)^2^+0.0000P] where P=(Fo^2^+2Fc^2^)/3' 
_atom_sites_solution_primary      direct 
_atom_sites_solution_secondary    difmap 
_atom_sites_solution_hydrogens    geom 
_refine_ls_hydrogen_treatment     constr 
_refine_ls_extinction_method      none 
_refine_ls_extinction_coef        ? 
_refine_ls_number_reflns          9945 
_refine_ls_number_parameters      689 
_refine_ls_number_restraints      85 
_refine_ls_R_factor_all           0.2156 
_refine_ls_R_factor_gt            0.0734 
_refine_ls_wR_factor_ref          0.1068 
_refine_ls_wR_factor_gt           0.0812 
_refine_ls_goodness_of_fit_ref    0.877 
_refine_ls_restrained_S_all       0.896 
_refine_ls_shift/su_max           0.013 
_refine_ls_shift/su_mean          0.000 
 
loop_ 
 _atom_site_label 
 _atom_site_type_symbol 
 _atom_site_fract_x 
 _atom_site_fract_y 
 _atom_site_fract_z 
 _atom_site_U_iso_or_equiv 
 _atom_site_adp_type 
 _atom_site_occupancy 
 _atom_site_symmetry_multiplicity 
 _atom_site_calc_flag 
 _atom_site_refinement_flags 
 _atom_site_disorder_assembly 
 _atom_site_disorder_group 
Si1 Si 0.19888(12) 0.32629(10) 0.18388(7) 0.0209(4) Uani 1 1 d . . . 
Si2 Si 0.07921(12) 0.24955(10) 0.27026(7) 0.0212(4) Uani 1 1 d . . . 
N1 N 0.3419(3) 0.3209(3) 0.17441(18) 0.0202(10) Uani 1 1 d . . . 
N2 N 0.1776(3) 0.3883(3) 0.12203(18) 0.0200(9) Uani 1 1 d . . . 
N3 N 0.0425(3) 0.3313(3) 0.34214(18) 0.0216(10) Uani 1 1 d . . . 
N4 N -0.0874(3) 0.1307(3) 0.25632(18) 0.0202(10) Uani 1 1 d . . . 
O1 O 0.0866(2) 0.2026(2) 0.18925(14) 0.0226(8) Uani 1 1 d . . . 
O2 O 0.1856(2) 0.3819(2) 0.25603(14) 0.0243(8) Uani 1 1 d . . . 
O3 O 0.1629(3) 0.2019(2) 0.31175(15) 0.0252(8) Uani 1 1 d . . . 
H3 H 0.2211 0.1987 0.2916 0.038 Uiso 1 1 calc R . . 
C1 C 0.5066(4) 0.3250(4) 0.1102(2) 0.0380(14) Uani 1 1 d . . . 
H1A H 0.5559 0.3188 0.1463 0.057 Uiso 1 1 calc R . . 
H1B H 0.5374 0.3295 0.0699 0.057 Uiso 1 1 calc R . . 
C2 C 0.3935(4) 0.3273(3) 0.1162(2) 0.0249(13) Uani 1 1 d . . . 
C3 C 0.3136(4) 0.3317(3) 0.0608(2) 0.0221(12) Uani 1 1 d . . . 
H3A H 0.3319 0.3112 0.0188 0.033 Uiso 1 1 calc R . . 
C4 C 0.2166(4) 0.3617(3) 0.0626(2) 0.0233(12) Uani 1 1 d . . . 
C5 C 0.1428(4) 0.3631(4) 0.0015(2) 0.0361(14) Uani 1 1 d . . . 
H5A H 0.1838 0.3495 -0.0356 0.054 Uiso 1 1 calc R . . 
H5B H 0.1424 0.4382 0.0055 0.054 Uiso 1 1 calc R . . 
H5C H 0.0539 0.3024 -0.0053 0.054 Uiso 1 1 calc R . . 
C6 C 0.4012(4) 0.2880(4) 0.2248(2) 0.0219(12) Uani 1 1 d . . . 
C7 C 0.3708(4) 0.1704(4) 0.2182(2) 0.0237(12) Uani 1 1 d . . . 
C8 C 0.4167(4) 0.1379(4) 0.2713(3) 0.0318(14) Uani 1 1 d . . . 
H8 H 0.3970 0.0592 0.2684 0.048 Uiso 1 1 calc R . . 
C9 C 0.4895(4) 0.2179(4) 0.3273(3) 0.0322(14) Uani 1 1 d . . . 
H9 H 0.5157 0.1940 0.3637 0.048 Uiso 1 1 calc R . . 
C10 C 0.5244(4) 0.3330(4) 0.3304(2) 0.0342(14) Uani 1 1 d . . . 
H10 H 0.5801 0.3882 0.3681 0.051 Uiso 1 1 calc R . . 
C11 C 0.4806(4) 0.3704(4) 0.2802(2) 0.0235(12) Uani 1 1 d . . . 
C12 C 0.2961(4) 0.0800(3) 0.1569(2) 0.0300(13) Uani 1 1 d . . . 
H12 H 0.2677 0.1176 0.1255 0.045 Uiso 1 1 calc R . . 
C13 C 0.3812(4) 0.0308(4) 0.1244(2) 0.0409(15) Uani 1 1 d . . . 
H13A H 0.4564 0.0934 0.1144 0.061 Uiso 1 1 calc R . . 
H13B H 0.3312 -0.0257 0.0839 0.061 Uiso 1 1 calc R . . 
H13C H 0.4102 -0.0068 0.1542 0.061 Uiso 1 1 calc R . . 
C14 C 0.1749(4) -0.0182(3) 0.1700(2) 0.0398(15) Uani 1 1 d . . . 
H14A H 0.2005 -0.0601 0.1981 0.060 Uiso 1 1 calc R . . 
H14B H 0.1245 -0.0710 0.1285 0.060 Uiso 1 1 calc R . . 
H14C H 0.1225 0.0139 0.1917 0.060 Uiso 1 1 calc R . . 
C15 C 0.5224(4) 0.4973(3) 0.2835(2) 0.0292(13) Uani 1 1 d . . . 
H15 H 0.4666 0.5045 0.2475 0.044 Uiso 1 1 calc R . . 
C16 C 0.6619(5) 0.5556(4) 0.2727(3) 0.084(2) Uani 1 1 d U . . 
H16A H 0.6866 0.6367 0.2727 0.126 Uiso 1 1 calc R . . 
H16B H 0.6702 0.5169 0.2307 0.126 Uiso 1 1 calc R . . 
H16C H 0.7185 0.5506 0.3079 0.126 Uiso 1 1 calc R . . 
C17 C 0.5094(4) 0.5595(4) 0.3471(2) 0.0460(16) Uani 1 1 d . . . 
H17A H 0.4213 0.5193 0.3556 0.069 Uiso 1 1 calc R . . 
H17B H 0.5280 0.6385 0.3446 0.069 Uiso 1 1 calc R . . 
H17C H 0.5706 0.5610 0.3826 0.069 Uiso 1 1 calc R . . 
C18 C 0.1463(4) 0.4861(3) 0.1280(2) 0.0202(12) Uani 1 1 d . . . 
C19 C 0.2458(4) 0.5957(4) 0.1306(2) 0.0254(12) Uani 1 1 d . . . 
C20 C 0.2127(5) 0.6847(4) 0.1306(2) 0.0347(14) Uani 1 1 d . . . 
H20 H 0.2780 0.7587 0.1298 0.052 Uiso 1 1 calc R . . 
C21 C 0.0876(5) 0.6700(4) 0.1316(2) 0.0353(14) Uani 1 1 d . . . 
H21 H 0.0681 0.7334 0.1331 0.053 Uiso 1 1 calc R . . 
C22 C -0.0080(4) 0.5614(4) 0.1302(2) 0.0325(14) Uani 1 1 d . . . 
H22 H -0.0938 0.5507 0.1316 0.049 Uiso 1 1 calc R . . 
C23 C 0.0183(4) 0.4677(3) 0.1270(2) 0.0219(12) Uani 1 1 d . . . 
C24 C 0.3870(4) 0.6194(4) 0.1326(2) 0.0310(13) Uani 1 1 d . . . 
H24 H 0.3943 0.5493 0.1405 0.047 Uiso 1 1 calc R . . 
C25 C 0.4776(4) 0.7213(4) 0.1881(2) 0.0457(15) Uani 1 1 d . . . 
H25A H 0.5662 0.7315 0.1886 0.068 Uiso 1 1 calc R . . 
H25B H 0.4512 0.7060 0.2299 0.068 Uiso 1 1 calc R . . 
H25C H 0.4731 0.7916 0.1812 0.068 Uiso 1 1 calc R . . 
C26 C 0.4319(4) 0.6415(4) 0.0680(3) 0.0494(16) Uani 1 1 d . . . 
H26A H 0.4269 0.7106 0.0594 0.074 Uiso 1 1 calc R . . 
H26B H 0.3765 0.5752 0.0327 0.074 Uiso 1 1 calc R . . 
H26C H 0.5213 0.6529 0.0704 0.074 Uiso 1 1 calc R . . 
C27 C -0.0934(4) 0.3487(4) 0.1190(2) 0.0239(12) Uani 1 1 d . . . 
H27 H -0.0575 0.2916 0.1157 0.036 Uiso 1 1 calc R . . 
C28 C -0.1619(4) 0.3410(3) 0.1785(2) 0.0358(14) Uani 1 1 d . . . 
H28A H -0.1019 0.3518 0.2173 0.054 Uiso 1 1 calc R . . 
H28B H -0.2364 0.2652 0.1711 0.054 Uiso 1 1 calc R . . 
H28C H -0.1911 0.4011 0.1851 0.054 Uiso 1 1 calc R . . 
C29 C -0.1887(4) 0.3170(4) 0.0572(2) 0.0421(15) Uani 1 1 d . . . 
H29A H -0.2255 0.3718 0.0593 0.063 Uiso 1 1 calc R . . 
H29B H -0.2580 0.2391 0.0528 0.063 Uiso 1 1 calc R . . 
H29C H -0.1444 0.3194 0.0194 0.063 Uiso 1 1 calc R . . 
C30 C -0.0873(4) 0.3882(3) 0.4158(2) 0.0391(15) Uani 1 1 d . . . 
H30A H -0.1161 0.3426 0.4488 0.059 Uiso 1 1 calc R . . 
H30B H -0.1510 0.4147 0.4030 0.059 Uiso 1 1 calc R . . 
H30C H -0.0039 0.4549 0.4338 0.059 Uiso 1 1 calc R . . 
C31 C -0.0734(4) 0.3147(4) 0.3568(2) 0.0242(13) Uani 1 1 d . . . 
C32 C -0.1856(4) 0.2271(4) 0.3213(2) 0.0276(13) Uani 1 1 d . . . 
H32 H -0.2640 0.2304 0.3278 0.041 Uiso 1 1 calc R . . 
C33 C -0.1932(4) 0.1346(4) 0.2768(2) 0.0274(13) Uani 1 1 d . . . 
C34 C -0.3250(4) 0.0358(3) 0.2508(2) 0.0361(14) Uani 1 1 d . . . 
H34A H -0.3506 0.0344 0.2051 0.054 Uiso 1 1 calc R . . 
H34B H -0.3875 0.0456 0.2765 0.054 Uiso 1 1 calc R . . 
H34C H -0.3225 -0.0368 0.2538 0.054 Uiso 1 1 calc R . . 
C35 C 0.1520(4) 0.4261(4) 0.3875(2) 0.0221(12) Uani 1 1 d . . . 
C36 C 0.1878(4) 0.5406(4) 0.3822(2) 0.0249(12) Uani 1 1 d . . . 
C37 C 0.2843(5) 0.6287(4) 0.4288(3) 0.0346(14) Uani 1 1 d . . . 
H37 H 0.3100 0.7061 0.4250 0.052 Uiso 1 1 calc R . . 
C38 C 0.3441(4) 0.6075(4) 0.4804(3) 0.0372(14) Uani 1 1 d . . . 
H38 H 0.4088 0.6698 0.5123 0.056 Uiso 1 1 calc R . . 
C39 C 0.3100(4) 0.4952(4) 0.4858(2) 0.0359(14) Uani 1 1 d . . . 
H39 H 0.3544 0.4807 0.5204 0.054 Uiso 1 1 calc R . . 
C40 C 0.2103(4) 0.4026(4) 0.4406(2) 0.0290(13) Uani 1 1 d . . . 
C41 C 0.1278(5) 0.5722(4) 0.3265(2) 0.0342(14) Uani 1 1 d . . . 
H41 H 0.0687 0.4997 0.2941 0.051 Uiso 1 1 calc R . . 
C42 C 0.0500(5) 0.6367(4) 0.3494(3) 0.0635(19) Uani 1 1 d . . . 
H42A H -0.0261 0.5848 0.3648 0.095 Uiso 1 1 calc R . . 
H42B H 0.0226 0.6634 0.3129 0.095 Uiso 1 1 calc R . . 
H42C H 0.1039 0.7031 0.3850 0.095 Uiso 1 1 calc R . . 
C43 C 0.2317(5) 0.6479(4) 0.2927(2) 0.0520(17) Uani 1 1 d . . . 
H43A H 0.2901 0.7197 0.3238 0.078 Uiso 1 1 calc R . . 
H43B H 0.1913 0.6656 0.2561 0.078 Uiso 1 1 calc R . . 
H43C H 0.2806 0.6072 0.2762 0.078 Uiso 1 1 calc R . . 
C44 C 0.1684(4) 0.2828(4) 0.4542(2) 0.0317(13) Uani 1 1 d . . . 
H44 H 0.1050 0.2254 0.4157 0.048 Uiso 1 1 calc R . . 
C45 C 0.1008(5) 0.2729(4) 0.5142(2) 0.0531(17) Uani 1 1 d . . . 
H45A H 0.1605 0.3304 0.5522 0.080 Uiso 1 1 calc R . . 
H45B H 0.0739 0.1956 0.5226 0.080 Uiso 1 1 calc R . . 
H45C H 0.0248 0.2864 0.5059 0.080 Uiso 1 1 calc R . . 
C46 C 0.2826(4) 0.2550(4) 0.4639(2) 0.0454(15) Uani 1 1 d . . . 
H46A H 0.3230 0.2599 0.4247 0.068 Uiso 1 1 calc R . . 
H46B H 0.2523 0.1769 0.4715 0.068 Uiso 1 1 calc R . . 
H46C H 0.3458 0.3103 0.5016 0.068 Uiso 1 1 calc R . . 
C47 C -0.1064(4) 0.0154(4) 0.2237(3) 0.0231(12) Uani 1 1 d . . . 
C48 C -0.0921(4) -0.0546(4) 0.2641(2) 0.0237(12) Uani 1 1 d . . . 
C49 C -0.1137(4) -0.1654(4) 0.2354(3) 0.0313(13) Uani 1 1 d . . . 
H49 H -0.1016 -0.2130 0.2620 0.047 Uiso 1 1 calc R . . 
C50 C -0.1523(4) -0.2074(4) 0.1690(3) 0.0333(14) Uani 1 1 d . . . 
H50 H -0.1677 -0.2836 0.1499 0.050 Uiso 1 1 calc R . . 
C51 C -0.1683(4) -0.1374(4) 0.1305(2) 0.0315(13) Uani 1 1 d . . . 
H51 H -0.1946 -0.1670 0.0848 0.047 Uiso 1 1 calc R . . 
C52 C -0.1475(4) -0.0253(4) 0.1559(3) 0.0249(13) Uani 1 1 d . . . 
C53 C -0.0607(5) -0.0193(4) 0.3370(3) 0.0347(14) Uani 1 1 d . . . 
H53 H -0.0386 0.0644 0.3496 0.052 Uiso 1 1 calc R . . 
C54 C -0.1777(5) -0.0854(4) 0.3680(3) 0.0609(18) Uani 1 1 d . . . 
H54A H -0.2500 -0.0712 0.3523 0.091 Uiso 1 1 calc R . . 
H54B H -0.1554 -0.0592 0.4156 0.091 Uiso 1 1 calc R . . 
H54C H -0.2025 -0.1681 0.3559 0.091 Uiso 1 1 calc R . . 
C55 C 0.0547(5) -0.0342(4) 0.3648(2) 0.0513(17) Uani 1 1 d . . . 
H55A H 0.0332 -0.1163 0.3562 0.077 Uiso 1 1 calc R . . 
H55B H 0.0767 -0.0025 0.4120 0.077 Uiso 1 1 calc R . . 
H55C H 0.1285 0.0066 0.3441 0.077 Uiso 1 1 calc R . . 
C56 C -0.1747(4) 0.0404(4) 0.1090(2) 0.0294(13) Uani 1 1 d . . . 
H56 H -0.1572 0.1181 0.1345 0.044 Uiso 1 1 calc R . . 
C57 C -0.0887(4) 0.0570(3) 0.0574(2) 0.0349(14) Uani 1 1 d . . . 
H57A H 0.0019 0.0941 0.0786 0.052 Uiso 1 1 calc R . . 
H57B H -0.1035 0.1057 0.0305 0.052 Uiso 1 1 calc R . . 
H57C H -0.1090 -0.0181 0.0298 0.052 Uiso 1 1 calc R . . 
C58 C -0.3171(4) -0.0209(3) 0.0743(2) 0.0367(14) Uani 1 1 d . . . 
H58A H -0.3357 -0.0969 0.0484 0.055 Uiso 1 1 calc R . . 
H58B H -0.3317 0.0253 0.0455 0.055 Uiso 1 1 calc R . . 
H58C H -0.3740 -0.0301 0.1070 0.055 Uiso 1 1 calc R . . 
C59 C 0.467(2) 0.9728(17) 0.4540(13) 0.225(10) Uani 0.50 1 d PDU A -1 
H59 H 0.4068 0.9548 0.4157 0.338 Uiso 0.50 1 calc PR A -1 
C60 C 0.589(2) 1.0027(18) 0.4536(14) 0.247(11) Uani 0.50 1 d PDU A -1 
H60 H 0.6238 1.0050 0.4144 0.371 Uiso 0.50 1 calc PR A -1 
C61 C 0.6621(19) 1.0299(15) 0.5118(15) 0.231(10) Uani 0.50 1 d PDU A -1 
H61 H 0.7516 1.0546 0.5115 0.347 Uiso 0.50 1 calc PR A -1 
C62 C 0.627(2) 1.0271(13) 0.5702(11) 0.170(7) Uani 0.50 1 d PDU A -1 
H62 H 0.6873 1.0448 0.6084 0.255 Uiso 0.50 1 calc PR A -1 
C63 C 0.507(2) 0.9995(12) 0.5726(10) 0.167(7) Uani 0.50 1 d PDU A -1 
H63 H 0.4747 1.0004 0.6125 0.251 Uiso 0.50 1 calc PR A -1 
C64 C 0.4333(17) 0.9696(13) 0.5148(11) 0.221(10) Uani 0.50 1 d PDU A -1 
C65 C 0.2901(17) 0.9269(12) 0.5200(11) 0.203(11) Uani 0.50 1 d PDU A -1 
H65A H 0.2720 0.8896 0.5571 0.304 Uiso 0.50 1 calc PR A -1 
H65B H 0.2372 0.8714 0.4797 0.304 Uiso 0.50 1 calc PR A -1 
H65C H 0.2695 0.9924 0.5265 0.304 Uiso 0.50 1 calc PR A -1 
 
loop_ 
 _atom_site_aniso_label 
 _atom_site_aniso_U_11 
 _atom_site_aniso_U_22 
 _atom_site_aniso_U_33 
 _atom_site_aniso_U_23 
 _atom_site_aniso_U_13 
 _atom_site_aniso_U_12 
Si1 0.0191(8) 0.0239(8) 0.0214(10) 0.0042(7) 0.0034(7) 0.0114(7) 
Si2 0.0179(8) 0.0246(8) 0.0236(10) 0.0057(7) 0.0027(7) 0.0119(7) 
N1 0.016(2) 0.026(2) 0.023(3) 0.012(2) 0.009(2) 0.0107(19) 
N2 0.017(2) 0.024(2) 0.021(3) 0.0067(19) 0.004(2) 0.0106(19) 
N3 0.014(2) 0.020(2) 0.026(3) -0.0038(19) 0.005(2) 0.0059(19) 
N4 0.015(2) 0.022(2) 0.025(3) 0.0010(19) 0.0047(19) 0.0103(18) 
O1 0.0203(19) 0.0217(17) 0.017(2) 0.0005(15) 0.0043(16) 0.0021(15) 
O2 0.029(2) 0.0195(17) 0.021(2) 0.0018(15) 0.0112(17) 0.0079(15) 
O3 0.024(2) 0.0325(18) 0.027(2) 0.0084(16) 0.0109(16) 0.0182(17) 
C1 0.030(3) 0.065(4) 0.029(4) 0.019(3) 0.014(3) 0.026(3) 
C2 0.013(3) 0.022(3) 0.035(4) 0.003(3) 0.007(3) 0.004(2) 
C3 0.029(3) 0.021(3) 0.012(3) 0.000(2) 0.001(2) 0.010(2) 
C4 0.023(3) 0.020(3) 0.026(4) 0.012(3) 0.005(3) 0.007(2) 
C5 0.045(4) 0.046(3) 0.026(4) 0.008(3) 0.000(3) 0.030(3) 
C6 0.021(3) 0.025(3) 0.029(4) 0.013(3) 0.011(3) 0.015(2) 
C7 0.014(3) 0.045(3) 0.020(3) 0.009(3) 0.005(2) 0.020(3) 
C8 0.028(3) 0.034(3) 0.042(4) 0.002(3) 0.007(3) 0.022(3) 
C9 0.033(3) 0.050(3) 0.036(4) 0.029(3) 0.019(3) 0.031(3) 
C10 0.022(3) 0.051(3) 0.029(4) 0.004(3) -0.004(3) 0.019(3) 
C11 0.016(3) 0.031(3) 0.026(4) 0.004(3) 0.005(3) 0.013(3) 
C12 0.032(3) 0.028(3) 0.032(4) 0.005(3) 0.003(3) 0.016(3) 
C13 0.045(4) 0.040(3) 0.038(4) -0.008(3) 0.005(3) 0.025(3) 
C14 0.026(3) 0.029(3) 0.058(4) 0.004(3) 0.002(3) 0.010(3) 
C15 0.024(3) 0.024(3) 0.031(4) 0.005(3) 0.003(3) 0.004(2) 
C16 0.066(4) 0.048(4) 0.117(6) 0.006(4) 0.057(4) 0.003(3) 
C17 0.061(4) 0.035(3) 0.044(4) 0.000(3) 0.006(3) 0.026(3) 
C18 0.026(3) 0.024(3) 0.015(3) 0.001(2) -0.001(2) 0.017(3) 
C19 0.025(3) 0.025(3) 0.019(3) 0.004(2) -0.001(2) 0.005(3) 
C20 0.039(4) 0.017(3) 0.040(4) 0.008(3) 0.000(3) 0.005(3) 
C21 0.049(4) 0.028(3) 0.033(4) 0.007(3) -0.003(3) 0.023(3) 
C22 0.030(3) 0.024(3) 0.042(4) 0.001(3) -0.002(3) 0.014(3) 
C23 0.029(3) 0.016(3) 0.017(3) 0.006(2) 0.001(2) 0.006(2) 
C24 0.022(3) 0.030(3) 0.034(4) 0.011(3) 0.003(3) 0.003(2) 
C25 0.028(3) 0.047(3) 0.049(4) 0.000(3) -0.002(3) 0.010(3) 
C26 0.040(4) 0.048(3) 0.050(4) 0.015(3) 0.015(3) 0.008(3) 
C27 0.017(3) 0.033(3) 0.030(4) 0.013(3) -0.001(3) 0.017(3) 
C28 0.027(3) 0.034(3) 0.041(4) 0.010(3) 0.004(3) 0.008(3) 
C29 0.036(4) 0.039(3) 0.049(4) 0.003(3) -0.004(3) 0.019(3) 
C30 0.028(3) 0.042(3) 0.047(4) 0.005(3) 0.019(3) 0.014(3) 
C31 0.032(3) 0.025(3) 0.023(4) 0.000(3) 0.005(3) 0.021(3) 
C32 0.015(3) 0.028(3) 0.044(4) 0.008(3) 0.008(3) 0.014(3) 
C33 0.025(3) 0.028(3) 0.031(4) 0.013(3) 0.012(3) 0.010(3) 
C34 0.017(3) 0.036(3) 0.045(4) 0.004(3) 0.005(3) 0.004(2) 
C35 0.014(3) 0.030(3) 0.017(3) -0.002(2) 0.002(2) 0.008(2) 
C36 0.019(3) 0.023(3) 0.029(4) 0.001(3) 0.003(3) 0.008(2) 
C37 0.036(4) 0.030(3) 0.035(4) 0.000(3) 0.009(3) 0.014(3) 
C38 0.031(3) 0.042(3) 0.028(4) -0.010(3) -0.001(3) 0.013(3) 
C39 0.044(4) 0.038(3) 0.030(4) 0.007(3) 0.008(3) 0.022(3) 
C40 0.024(3) 0.027(3) 0.024(4) -0.004(3) 0.003(3) 0.004(3) 
C41 0.048(4) 0.029(3) 0.027(4) -0.004(3) -0.003(3) 0.024(3) 
C42 0.070(5) 0.059(4) 0.085(6) 0.016(4) 0.013(4) 0.050(4) 
C43 0.078(5) 0.044(3) 0.036(4) 0.010(3) 0.013(4) 0.028(3) 
C44 0.032(3) 0.038(3) 0.025(4) 0.009(3) 0.007(3) 0.014(3) 
C45 0.062(4) 0.068(4) 0.035(4) 0.024(3) 0.021(3) 0.028(3) 
C46 0.044(4) 0.050(3) 0.044(4) 0.005(3) -0.005(3) 0.027(3) 
C47 0.011(3) 0.018(3) 0.035(4) 0.002(3) 0.014(3) 0.001(2) 
C48 0.014(3) 0.023(3) 0.028(4) 0.003(3) 0.001(3) 0.003(2) 
C49 0.036(3) 0.026(3) 0.035(4) 0.010(3) 0.006(3) 0.016(3) 
C50 0.031(3) 0.020(3) 0.054(5) 0.006(3) 0.012(3) 0.017(3) 
C51 0.020(3) 0.036(3) 0.033(4) -0.001(3) 0.002(3) 0.011(3) 
C52 0.021(3) 0.019(3) 0.034(4) 0.001(3) 0.010(3) 0.008(2) 
C53 0.045(4) 0.023(3) 0.035(4) 0.011(3) 0.010(3) 0.012(3) 
C54 0.080(5) 0.061(4) 0.044(5) 0.020(3) 0.023(4) 0.029(4) 
C55 0.060(4) 0.043(3) 0.040(4) 0.010(3) -0.020(3) 0.018(3) 
C56 0.030(3) 0.021(3) 0.036(4) 0.011(3) 0.007(3) 0.008(3) 
C57 0.041(4) 0.028(3) 0.034(4) 0.012(3) 0.017(3) 0.011(3) 
C58 0.025(3) 0.039(3) 0.037(4) 0.001(3) -0.001(3) 0.009(3) 
C59 0.220(11) 0.224(11) 0.226(11) 0.055(5) 0.040(5) 0.092(6) 
C60 0.183(16) 0.327(16) 0.251(18) 0.016(16) 0.033(14) 0.150(14) 
C61 0.205(16) 0.308(16) 0.27(2) 0.028(17) 0.048(16) 0.204(14) 
C62 0.184(16) 0.199(12) 0.230(18) 0.109(13) 0.065(14) 0.155(13) 
C63 0.173(16) 0.154(11) 0.232(16) 0.156(11) 0.009(14) 0.090(13) 
C64 0.217(16) 0.194(13) 0.251(17) 0.031(14) 0.042(14) 0.096(15) 
C65 0.25(2) 0.066(11) 0.29(2) -0.029(13) 0.15(2) 0.068(13) 
 
_geom_special_details 
; 
 All esds (except the esd in the dihedral angle between two l.s. planes) 
 are estimated using the full covariance matrix.  The cell esds are taken 
 into account individually in the estimation of esds in distances, angles 
 and torsion angles; correlations between esds in cell parameters are only 
 used when they are defined by crystal symmetry.  An approximate (isotropic) 
 treatment of cell esds is used for estimating esds involving l.s. planes. 
; 
 
loop_ 
 _geom_bond_atom_site_label_1 
 _geom_bond_atom_site_label_2 
 _geom_bond_distance 
 _geom_bond_site_symmetry_2 
 _geom_bond_publ_flag 
Si1 O1 1.625(3) . ? 
Si1 O2 1.625(3) . ? 
Si1 N2 1.701(4) . ? 
Si1 N1 1.721(3) . ? 
Si1 Si2 2.468(2) . ? 
Si2 O3 1.633(3) . ? 
Si2 O1 1.740(3) . ? 
Si2 O2 1.746(3) . ? 
Si2 N4 1.860(4) . ? 
Si2 N3 1.897(4) . ? 
N1 C2 1.409(5) . ? 
N1 C6 1.442(5) . ? 
N2 C4 1.408(5) . ? 
N2 C18 1.469(5) . ? 
N3 C31 1.341(5) . ? 
N3 C35 1.465(5) . ? 
N4 C33 1.356(5) . ? 
N4 C47 1.473(5) . ? 
C1 C2 1.344(5) . ? 
C2 C3 1.457(6) . ? 
C3 C4 1.345(5) . ? 
C4 C5 1.494(6) . ? 
C6 C11 1.395(6) . ? 
C6 C7 1.411(5) . ? 
C7 C8 1.405(6) . ? 
C7 C12 1.508(6) . ? 
C8 C9 1.374(6) . ? 
C9 C10 1.379(5) . ? 
C10 C11 1.386(6) . ? 
C11 C15 1.514(5) . ? 
C12 C14 1.536(5) . ? 
C12 C13 1.543(5) . ? 
C15 C17 1.506(6) . ? 
C15 C16 1.526(5) . ? 
C18 C23 1.401(5) . ? 
C18 C19 1.401(5) . ? 
C19 C20 1.380(5) . ? 
C19 C24 1.530(6) . ? 
C20 C21 1.385(6) . ? 
C21 C22 1.381(5) . ? 
C22 C23 1.383(5) . ? 
C23 C27 1.520(5) . ? 
C24 C26 1.527(6) . ? 
C24 C25 1.535(6) . ? 
C27 C29 1.514(6) . ? 
C27 C28 1.535(6) . ? 
C30 C31 1.510(5) . ? 
C31 C32 1.367(6) . ? 
C32 C33 1.373(6) . ? 
C33 C34 1.507(5) . ? 
C35 C40 1.406(6) . ? 
C35 C36 1.408(5) . ? 
C36 C37 1.380(6) . ? 
C36 C41 1.520(6) . ? 
C37 C38 1.373(6) . ? 
C38 C39 1.384(5) . ? 
C39 C40 1.404(6) . ? 
C40 C44 1.523(5) . ? 
C41 C43 1.519(5) . ? 
C41 C42 1.537(5) . ? 
C44 C46 1.528(5) . ? 
C44 C45 1.536(5) . ? 
C47 C48 1.402(6) . ? 
C47 C52 1.406(6) . ? 
C48 C49 1.389(5) . ? 
C48 C53 1.497(6) . ? 
C49 C50 1.378(6) . ? 
C50 C51 1.382(6) . ? 
C51 C52 1.391(5) . ? 
C52 C56 1.512(6) . ? 
C53 C55 1.522(6) . ? 
C53 C54 1.536(5) . ? 
C56 C57 1.517(5) . ? 
C56 C58 1.549(5) . ? 
C59 C60 1.301(14) . ? 
C59 C64 1.374(13) . ? 
C60 C61 1.336(14) . ? 
C61 C62 1.330(14) . ? 
C62 C63 1.286(14) . ? 
C63 C64 1.328(14) . ? 
C64 C65 1.534(10) . ? 
 
loop_ 
 _geom_angle_atom_site_label_1 
 _geom_angle_atom_site_label_2 
 _geom_angle_atom_site_label_3 
 _geom_angle 
 _geom_angle_site_symmetry_1 
 _geom_angle_site_symmetry_3 
 _geom_angle_publ_flag 
O1 Si1 O2 89.16(15) . . ? 
O1 Si1 N2 119.70(18) . . ? 
O2 Si1 N2 116.90(17) . . ? 
O1 Si1 N1 112.13(15) . . ? 
O2 Si1 N1 117.73(19) . . ? 
N2 Si1 N1 102.03(18) . . ? 
N2 Si1 Si2 136.52(13) . . ? 
N1 Si1 Si2 121.43(14) . . ? 
O3 Si2 O1 104.28(15) . . ? 
O3 Si2 O2 108.10(16) . . ? 
O1 Si2 O2 81.74(14) . . ? 
O3 Si2 N4 102.83(16) . . ? 
O1 Si2 N4 87.99(16) . . ? 
O2 Si2 N4 148.92(16) . . ? 
O3 Si2 N3 97.64(17) . . ? 
O1 Si2 N3 157.82(16) . . ? 
O2 Si2 N3 88.36(15) . . ? 
N4 Si2 N3 90.44(16) . . ? 
O3 Si2 Si1 107.41(12) . . ? 
N4 Si2 Si1 125.28(14) . . ? 
N3 Si2 Si1 128.10(12) . . ? 
C2 N1 C6 117.1(4) . . ? 
C2 N1 Si1 124.1(3) . . ? 
C6 N1 Si1 117.8(3) . . ? 
C4 N2 C18 114.1(3) . . ? 
C4 N2 Si1 118.9(3) . . ? 
C18 N2 Si1 125.8(3) . . ? 
C31 N3 C35 114.5(4) . . ? 
C31 N3 Si2 127.9(3) . . ? 
C35 N3 Si2 117.5(3) . . ? 
C33 N4 C47 115.0(3) . . ? 
C33 N4 Si2 127.9(3) . . ? 
C47 N4 Si2 116.9(3) . . ? 
Si1 O1 Si2 94.28(15) . . ? 
Si1 O2 Si2 94.05(15) . . ? 
C1 C2 N1 123.1(5) . . ? 
C1 C2 C3 121.1(5) . . ? 
N1 C2 C3 115.7(4) . . ? 
C4 C3 C2 127.1(4) . . ? 
C3 C4 N2 121.0(4) . . ? 
C3 C4 C5 121.3(5) . . ? 
N2 C4 C5 117.7(4) . . ? 
C11 C6 C7 121.6(4) . . ? 
C11 C6 N1 120.0(4) . . ? 
C7 C6 N1 118.3(4) . . ? 
C8 C7 C6 117.5(5) . . ? 
C8 C7 C12 119.0(4) . . ? 
C6 C7 C12 123.5(4) . . ? 
C9 C8 C7 121.1(5) . . ? 
C8 C9 C10 119.7(5) . . ? 
C9 C10 C11 121.8(5) . . ? 
C10 C11 C6 118.0(4) . . ? 
C10 C11 C15 121.3(5) . . ? 
C6 C11 C15 120.7(4) . . ? 
C7 C12 C14 111.9(4) . . ? 
C7 C12 C13 111.2(4) . . ? 
C14 C12 C13 109.9(3) . . ? 
C17 C15 C11 113.1(4) . . ? 
C17 C15 C16 109.2(4) . . ? 
C11 C15 C16 110.1(4) . . ? 
C23 C18 C19 121.4(4) . . ? 
C23 C18 N2 120.0(4) . . ? 
C19 C18 N2 118.4(4) . . ? 
C20 C19 C18 117.5(4) . . ? 
C20 C19 C24 119.6(4) . . ? 
C18 C19 C24 122.9(4) . . ? 
C19 C20 C21 122.4(4) . . ? 
C22 C21 C20 118.7(4) . . ? 
C21 C22 C23 121.5(4) . . ? 
C22 C23 C18 118.3(4) . . ? 
C22 C23 C27 118.7(4) . . ? 
C18 C23 C27 122.8(4) . . ? 
C26 C24 C19 111.8(4) . . ? 
C26 C24 C25 109.2(4) . . ? 
C19 C24 C25 112.2(4) . . ? 
C29 C27 C23 111.5(4) . . ? 
C29 C27 C28 110.3(4) . . ? 
C23 C27 C28 111.0(4) . . ? 
N3 C31 C32 122.2(4) . . ? 
N3 C31 C30 121.8(4) . . ? 
C32 C31 C30 115.9(4) . . ? 
C31 C32 C33 124.7(4) . . ? 
N4 C33 C32 122.2(4) . . ? 
N4 C33 C34 120.2(4) . . ? 
C32 C33 C34 117.6(4) . . ? 
C40 C35 C36 120.4(4) . . ? 
C40 C35 N3 119.2(4) . . ? 
C36 C35 N3 120.0(4) . . ? 
C37 C36 C35 118.7(5) . . ? 
C37 C36 C41 118.1(4) . . ? 
C35 C36 C41 123.2(4) . . ? 
C38 C37 C36 121.7(5) . . ? 
C37 C38 C39 120.0(5) . . ? 
C38 C39 C40 120.5(5) . . ? 
C39 C40 C35 118.5(4) . . ? 
C39 C40 C44 117.3(5) . . ? 
C35 C40 C44 124.1(4) . . ? 
C43 C41 C36 110.5(4) . . ? 
C43 C41 C42 108.1(4) . . ? 
C36 C41 C42 112.7(4) . . ? 
C40 C44 C46 111.4(4) . . ? 
C40 C44 C45 110.0(4) . . ? 
C46 C44 C45 110.7(4) . . ? 
C48 C47 C52 121.9(4) . . ? 
C48 C47 N4 116.7(4) . . ? 
C52 C47 N4 121.2(4) . . ? 
C49 C48 C47 118.4(5) . . ? 
C49 C48 C53 117.5(4) . . ? 
C47 C48 C53 124.0(4) . . ? 
C50 C49 C48 121.1(5) . . ? 
C49 C50 C51 119.3(4) . . ? 
C50 C51 C52 122.7(5) . . ? 
C51 C52 C47 116.5(4) . . ? 
C51 C52 C56 117.6(5) . . ? 
C47 C52 C56 125.9(4) . . ? 
C48 C53 C55 112.8(4) . . ? 
C48 C53 C54 111.1(4) . . ? 
C55 C53 C54 109.8(4) . . ? 
C52 C56 C57 111.8(4) . . ? 
C52 C56 C58 111.9(4) . . ? 
C57 C56 C58 108.4(4) . . ? 
C60 C59 C64 113.8(17) . . ? 
C59 C60 C61 115.9(17) . . ? 
C62 C61 C60 128.9(17) . . ? 
C63 C62 C61 117.0(16) . . ? 
C62 C63 C64 114.5(15) . . ? 
C63 C64 C59 129.7(16) . . ? 
C63 C64 C65 112.3(16) . . ? 
C59 C64 C65 118.0(16) . . ? 
 
_diffrn_measured_fraction_theta_max    0.995 
_diffrn_reflns_theta_full              25.00 
_diffrn_measured_fraction_theta_full   0.995 
_refine_diff_density_max    0.307 
_refine_diff_density_min   -0.303 
_refine_diff_density_rms    0.056 
